# Supplementary material
Source: publisher figshare collection journal article supplement (https://gsapubs.figshare.com/ndownloader/files/22410357)
Supplement: Supplementary file 1 [file 22410357]

**Table S2. Carbonate lithofacies**

| Lithofacies      | Descriptions                                                                                                                                                                                      | Depositional environments                                                                   |
|------------------|---------------------------------------------------------------------------------------------------------------------------------------------------------------------------------------------------|---------------------------------------------------------------------------------------------|
| Microbialaminite | Undulose crinkly lamination with micro-unconformities, grainstone lenses, edge-wise intraclastic conglomerate, channels, tepee structure and tepee breccia, paleocalcrete, silcrete or ferricrete | Littoral and supralittoral zones                                                            |
| Grainstone       | Well-sorted arenite, generally oolitic or intraclastic, beds >0.2 m thick, commonly crossbedded, intraclast breccia, authigenic chert nodules                                                     | Shallow sublittoral and lower littoral zones, wave-dominated shoreface, off-shore sand bars |
| Stromatolite     | Discrete columnar or domal, internally-laminated microbialite, with or without branching, generally associated with grainstone                                                                    | Euphotic zone of sublittoral shelf and lower littoral zone                                  |
| Ribbonite        | Wavy-laminated lutite, beds <0.2 m thick, low-angle cross-stratification, wave or current ripples may be present                                                                                  | Open shelf and upper slope, above fairweather wave-base                                     |
| Marly ribbonite  | Argillaceous lutite, beds <0.2 m thick, low-angle cross-stratification, wave or current ripples, lenticular stratification                                                                        | Deep shelf and upper to middle slope, above storm wave-base                                 |
| Rhythmite        | Flat parallel-laminated lutite or marl, with or without turbidites or debrites                                                                                                                    | Restricted deep shelf, lower slope and basin floor                                          |
